# Supplementary material
Source: publisher figshare collection journal article supplement (https://gsajournals.figshare.com/ndownloader/files/27925620)
Supplement: Supplementary file 1 [file 27925620]

## Sheet: Table S3
Table S3. The expression patterns of NPF genes.
Gene ID	Description	Symbol	NLH			NL			NH
			log2(fc)	PValue	FDR	log2(fc)	PValue	FDR	log2(fc)	PValue	FDR
Glyma.15G016900	PREDICTED: protein NRT1/ PTR FAMILY 1.2-like [Glycine max]	NPF1.2	1.11121	7.08921e-09	2.93183e-07	-0.604104	0.00020218	0.00281805	0.50711	0.00166846	0.0114492
Glyma.01G041400	PREDICTED: protein NRT1/ PTR FAMILY 2.13-like [Glycine max]	NPF2.13	-1.44165	6.12171e-06	0.000139163	1.03431	0.00296915	0.0265233	-0.407343	0.273404	0.478017
Glyma.03G123000	Peptide transporter PTR5, partial [Cajanus cajan]	NPF3.1	-0.244087	0.322949	0.609933	1.1592	0.000266949	0.00357007	0.915111	0.00381805	0.0219129
Glyma.07G272600	PREDICTED: protein NRT1/ PTR FAMILY 4.3 [Glycine max]	NPF4.3	1.65333	6.0733e-21	1.22477e-18	-1.00157	1.53475e-09	6.11589e-08	0.651755	6.13873e-07	1.52961e-05
Glyma.12G163800	PREDICTED: protein NRT1/ PTR FAMILY 4.3 [Glycine max]	NPF4.3	1.55564	9.31903e-13	7.19109e-11	-0.95429	9.68709e-06	0.000190871	0.601348	0.000636045	0.00534815
Glyma.04G036100	PREDICTED: protein NRT1/ PTR FAMILY 4.3-like [Glycine max]	NPF4.5	-0.63078	0.000265168	0.00370638	1.16229	1.15633e-10	5.31811e-09	0.531512	0.00179223	0.0120857
Glyma.01G042100	PREDICTED: protein NRT1/ PTR FAMILY 4.3 [Glycine max]	NPF4.6	1.56807	7.68891e-10	3.77906e-08	-0.502289	0.0495432	0.220094	1.06579	3.1271e-06	6.33992e-05
Glyma.11G235200	PREDICTED: protein NRT1/ PTR FAMILY 5.1-like [Glycine max]	NPF5.1	1.68203	0.00042186	0.00547592	-0.631757	0.182785	0.496538	1.05027	0.00921711	0.0427936
Glyma.18G021700	PREDICTED: protein NRT1/ PTR FAMILY 5.1-like [Glycine max]	NPF5.1	-1.30058	0.000299541	0.00410614	1.73476	7.4735e-06	0.000151662	0.434183	0.351938	0.559947
Glyma.15G236100	PREDICTED: protein NRT1/ PTR FAMILY 5.4-like [Glycine max]	NPF5.4	1.35306	6.7938e-11	3.97895e-09	-1.05533	8.17402e-08	2.47671e-06	0.297729	0.121931	0.280169
Glyma.01G210500	PREDICTED: protein NRT1/ PTR FAMILY 6.3 [Glycine max]	NPF6.3	-2.61987	3.46117e-30	1.45604e-27	1.13594	2.06852e-15	1.62263e-13	-1.48393	4.39477e-06	8.48703e-05
Glyma.11G031500	PREDICTED: protein NRT1/ PTR FAMILY 6.3 [Glycine max]	NPF6.3	-1.03154	2.34197e-13	1.97894e-11	0.479918	4.39661e-06	9.44637e-05	-0.551619	8.96086e-07	2.11723e-05
Glyma.01G200100	PREDICTED: protein NRT1/ PTR FAMILY 7.3-like isoform X1 [Glycine max]	NPF7.3	1.38099	1.34847e-06	3.57184e-05	-0.343302	0.202271	0.525286	1.03769	1.57206e-05	0.000253603
Glyma.05G070600	PREDICTED: protein NRT1/ PTR FAMILY 7.3-like isoform X1 [Glycine max]	NPF7.3	1.66084	1.78819e-18	2.89087e-16	-1.04496	2.08463e-08	6.99233e-07	0.615879	8.36267e-05	0.00101982
Glyma.09G237600	PREDICTED: protein NRT1/ PTR FAMILY 7.3-like [Glycine max]	NPF7.3	4.61978	3.55116e-22	8.12468e-20	-1.9622	0.00410089	0.0345358	2.65758	4.90534e-15	7.81222e-13
Glyma.11G042000	PREDICTED: protein NRT1/ PTR FAMILY 7.3-like isoform X1 [Glycine max]	NPF7.3	1.89829	9.47427e-17	1.28257e-14	-0.569071	0.0195624	0.114439	1.32921	6.03897e-15	9.37819e-13
Glyma.17G153300	PREDICTED: protein NRT1/ PTR FAMILY 7.3-like [Glycine max]	NPF7.3	2.68239	3.11157e-48	4.05779e-45	-1.96816	5.97636e-31	1.728e-28	0.714228	9.49994e-11	6.572e-09
Glyma.18G260000	PREDICTED: protein NRT1/ PTR FAMILY 7.3-like [Glycine max]	NPF7.3	3.96413	2.2532e-21	4.81705e-19	-2.26946	1.06518e-05	0.00020736	1.69467	4.99893e-07	1.27794e-05
